# Supplementary material for: Enhanced CO oxidation with cobalt-impregnated porous single-crystal manganese oxides
Source: Royal Society of Chemistry journal article supplement (doi:10.1039/d2cy01581a), 2022-12-15
Supplement: d2cy01581a1.pdf [file d2cy01581a1.pdf]

## **Enhanced CO oxidation with cobalt-impregnated porous single crystal manganese oxides**

**Huayu Yu,<sup>abc</sup> Lei Yi,<sup>abc</sup> Fukuan Jiang,<sup>abc</sup> Xin Wang,<sup>a\*</sup> Kui Xie,<sup>bc\*</sup>**

<sup>a</sup>*(College of Materials Science and Engineering, Fuzhou University, Fuzhou 350108, China)*

<sup>b</sup>*(Fujian Science & Technology Innovation Laboratory for Optoelectronic Information of China, Fuzhou, Fujian 350108, China)*

<sup>c</sup>*(Key Laboratory of Design & Assembly of Functional Nanostructures, Fujian Institute of Research on the Structure of Matter, Chinese Academy of Sciences, Fuzhou 350002, China)*

\* Corresponding author. Xin Wang. E-mail: [xinxinwx@fzu.edu.cn](mailto:xinxinwx@fzu.edu.cn),

Kui Xie. E-mail: [kxie@fjirsm.ac.cn](mailto:kxie@fjirsm.ac.cn)

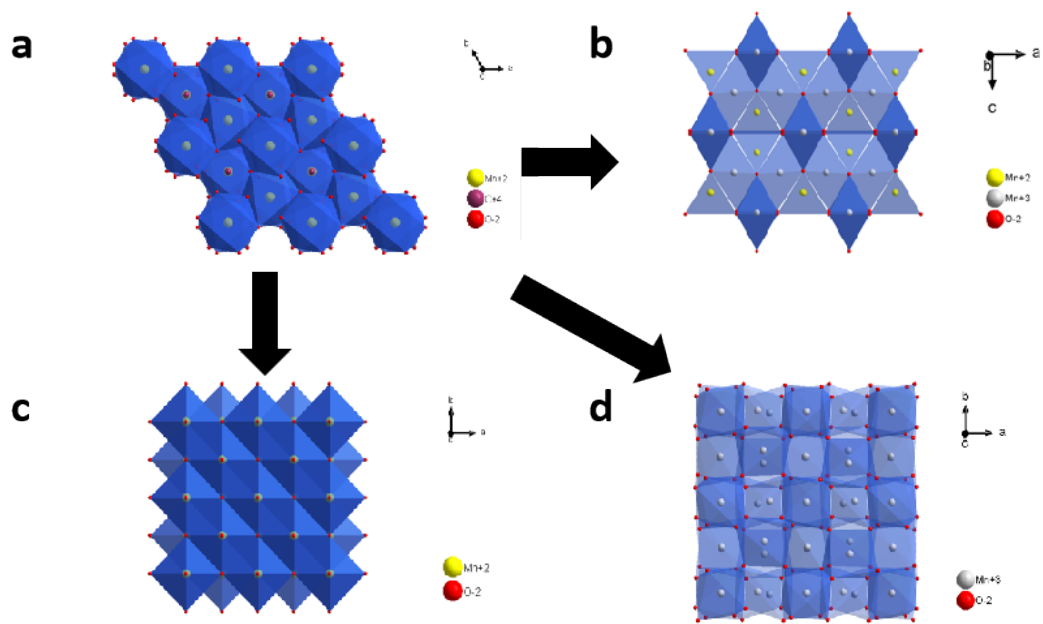

Fig. S1 Crystal structure simulation diagram (a) MnCO<sub>3</sub>, (b) Mn<sub>3</sub>O<sub>4</sub>, (c) MnO, (d) Mn<sub>2</sub>O<sub>3</sub>

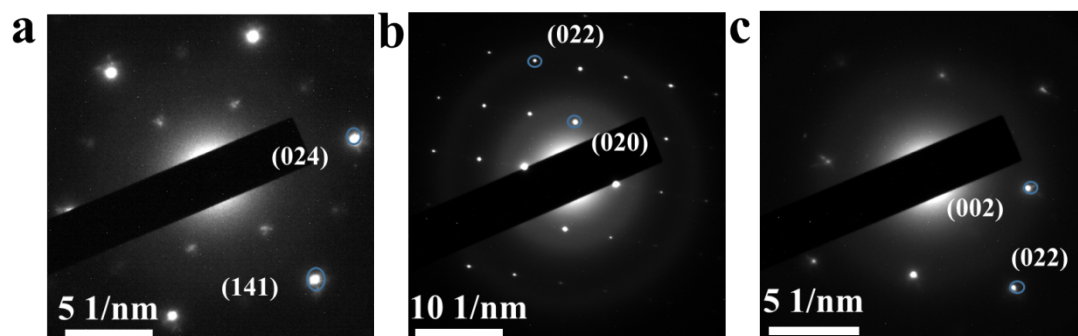

Fig. S2 SAED patterns of (a) Co-Mn<sub>2</sub>O<sub>3</sub>, (b) Co-Mn<sub>3</sub>O<sub>4</sub>, (c) Co-MnO. (The loading amount of Co: Co-Mn<sub>2</sub>O<sub>3</sub>, 6% ; Co-Mn<sub>3</sub>O<sub>4</sub>, 6% ; Co-MnO, 6%)

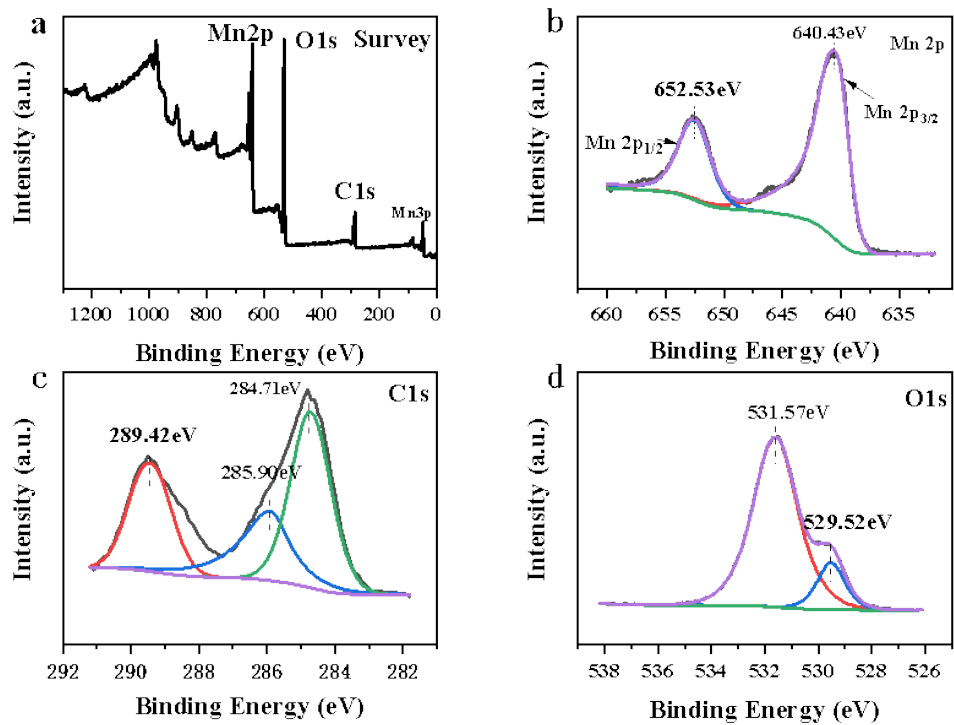

Fig. S3 MnCO<sub>3</sub> XPS photoelectron spectroscopy (a) the integral XPS spectrum of MnCO<sub>3</sub> (b) Mn 2p (c) C 1s (d) O 1s

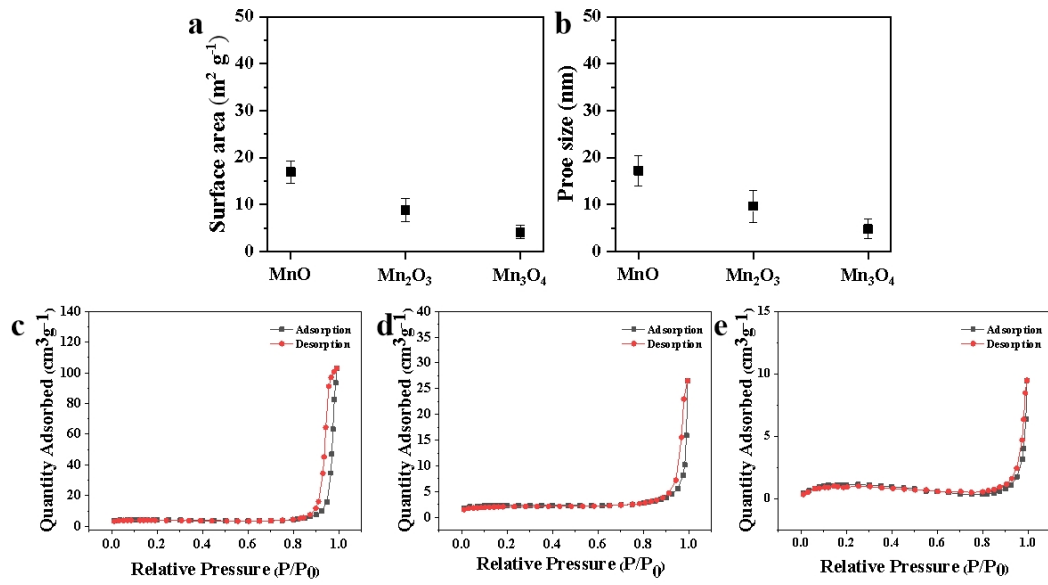

Fig. S4. (a, b) The surface specific area and BJH average pore size of MnO and Mn<sub>2</sub>O<sub>3</sub> and Mn<sub>3</sub>O<sub>4</sub> ; (c,d,e) N<sub>2</sub> adsorption-desorption isotherms (c) MnO, (d) Mn<sub>2</sub>O<sub>3</sub>, (e) Mn<sub>3</sub>O<sub>4</sub>

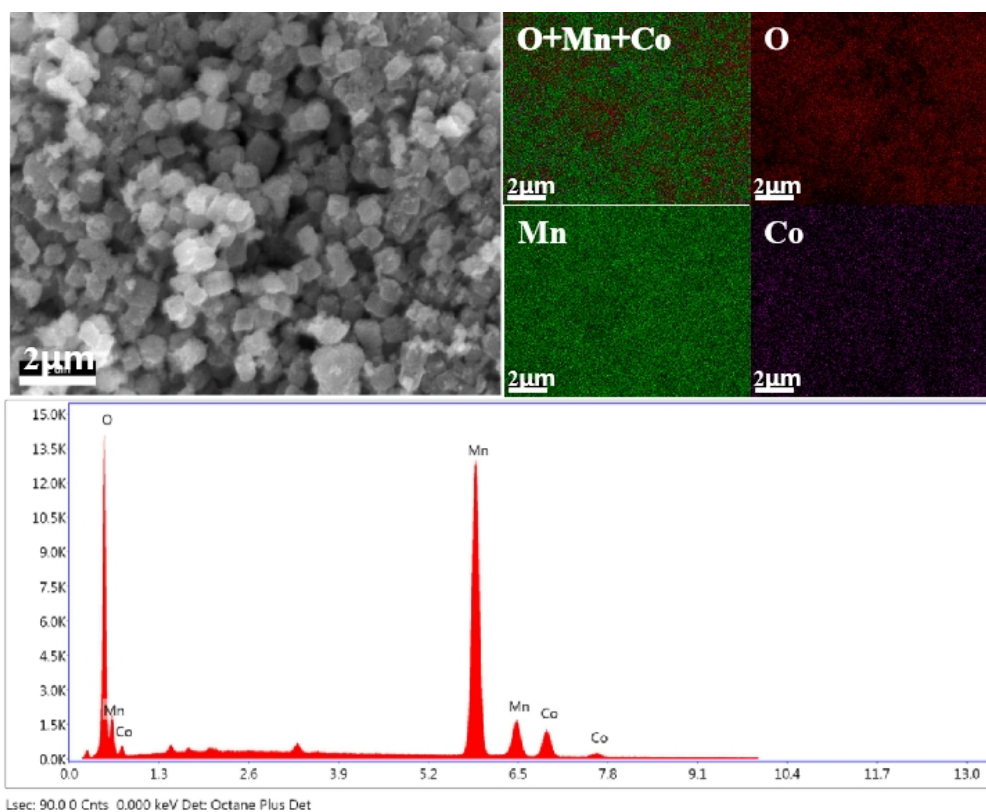

Fig. S5 EDS mapping images of Co-Mn<sub>2</sub>O<sub>3</sub> and the element analysis of Co-Mn<sub>2</sub>O<sub>3</sub>. (The loading amount of Co: Co-Mn<sub>2</sub>O<sub>3</sub>, 6%)

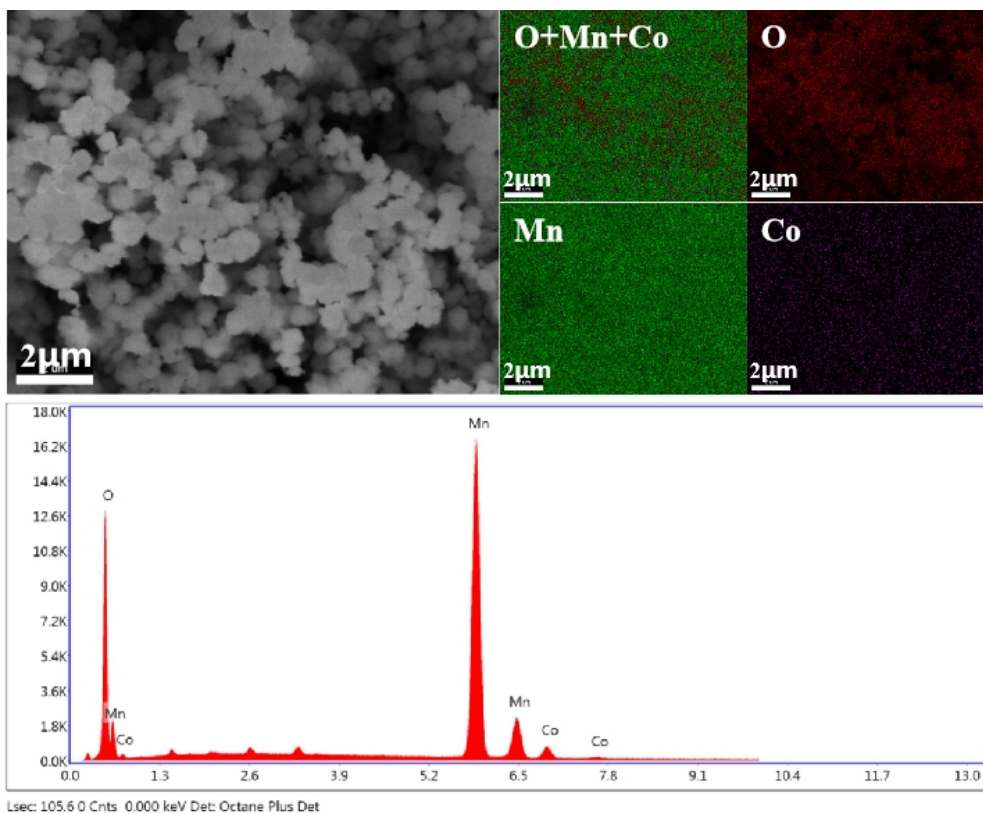

Fig. S6 EDS mapping images of Co-Mn<sub>3</sub>O<sub>4</sub> and the element analysis of Co-Mn<sub>3</sub>O<sub>4</sub>. (The loading amount of Co: Co-Mn<sub>3</sub>O<sub>4</sub>, 6%)

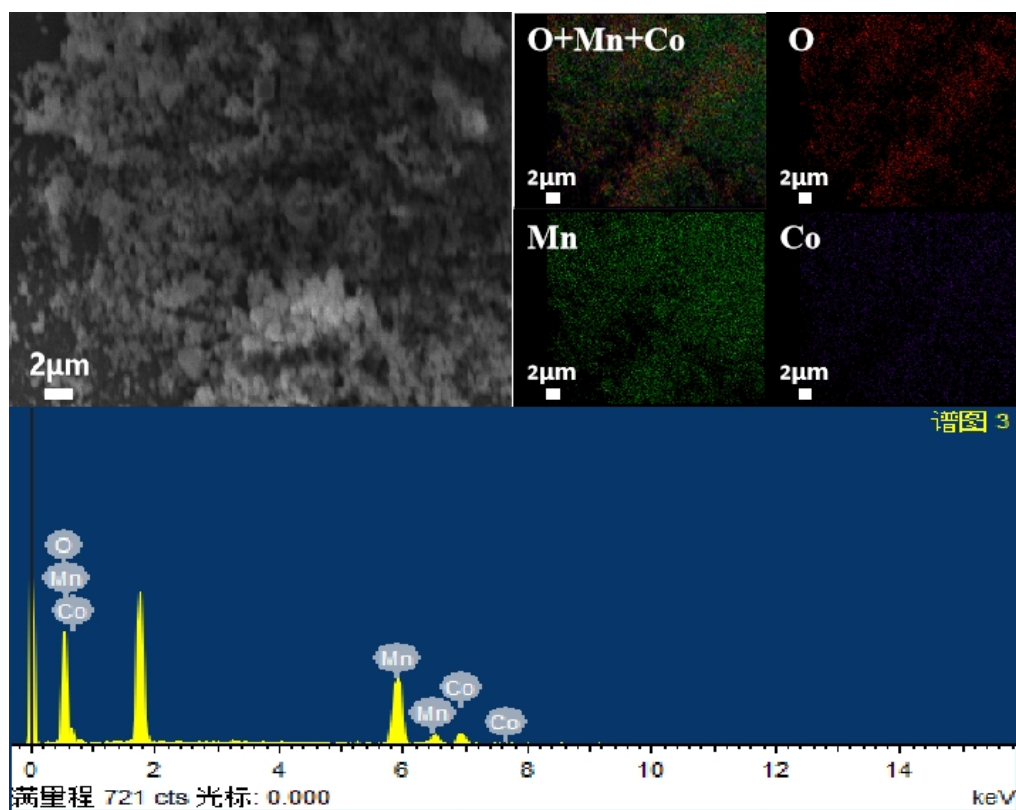

Fig. S7 EDS mapping images of Co-MnO and the element analysis of Co-MnO. (The loading amount of Co: Co-MnO, 6%)



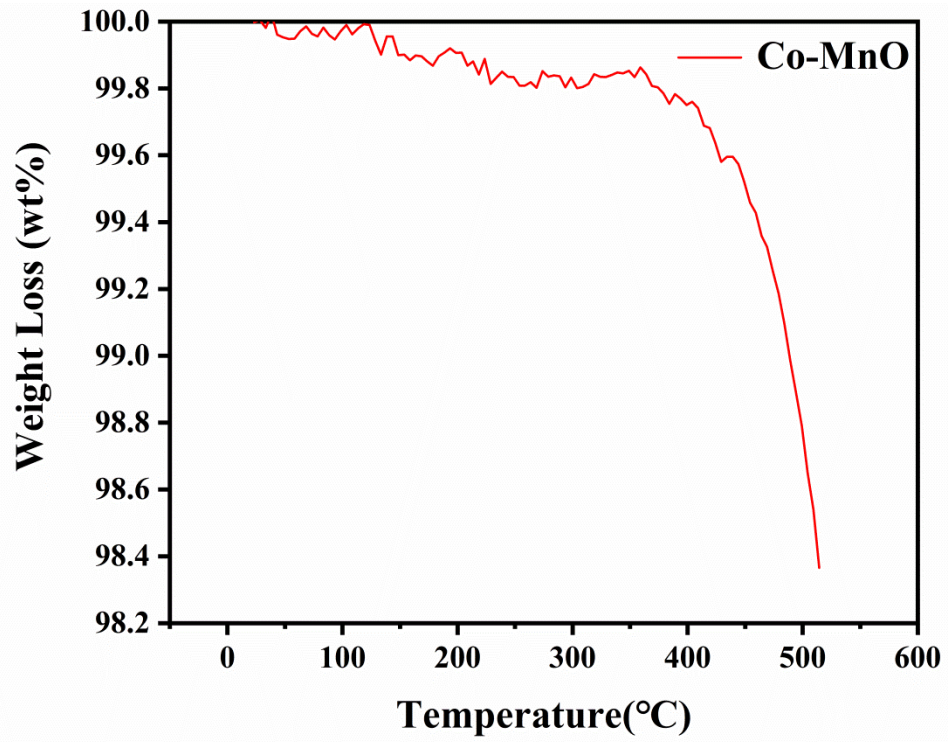

Fig. S8 TGA results of Co-MnO ( after inactivation ) in N<sub>2</sub> atmosphere. (The loading amount of Co: Co-MnO, 6%)

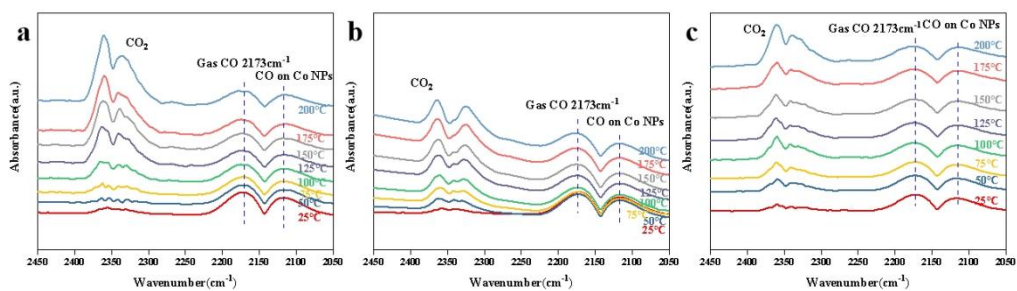

Fig. S9 (a-c) *In situ* FT-IR of CO oxidation with oxygen using Co-doped manganese oxides. (a) Co-Mn<sub>2</sub>O<sub>3</sub> (b) Co-Mn<sub>3</sub>O<sub>4</sub> (c) Co-MnO (The loading amount of Co: Co-Mn<sub>2</sub>O<sub>3</sub>, 6% ; Co-Mn<sub>3</sub>O<sub>4</sub>, 6% ; Co-MnO, 6%)

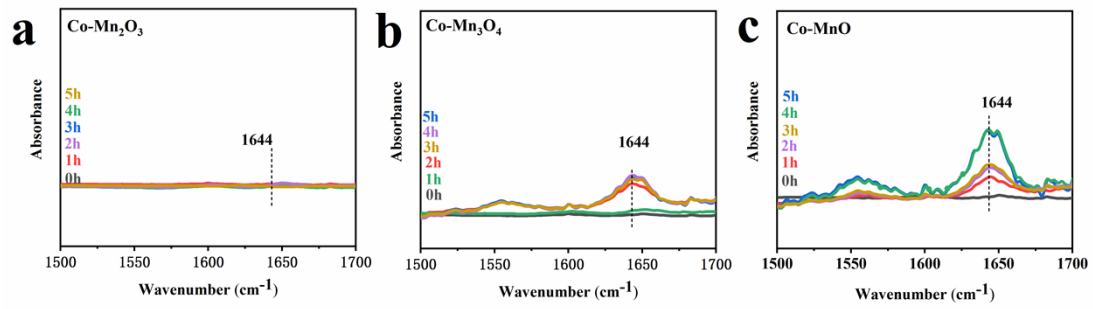

Fig. S10 (a-c) *In situ* FT-IR of CO oxidation of Co-doped manganese oxides at 200 ° C for 5 hours. (a) Co-Mn<sub>2</sub>O<sub>3</sub> (b) Co-Mn<sub>3</sub>O<sub>4</sub> (c) Co-MnO (The loading amount of Co: Co-Mn<sub>2</sub>O<sub>3</sub>, 6%; Co-Mn<sub>3</sub>O<sub>4</sub>, 6%; Co-MnO, 6%)

Table. S1 The proportions of Mn and Co in various valence states and O species before and after reduction. (The loading amount of Co: Co-Mn<sub>2</sub>O<sub>3</sub>, 6% ; Co-Mn<sub>3</sub>O<sub>4</sub>, 6% ; Co-MnO, 6% )

|                                   | Mn <sup>2+</sup> | Mn <sup>3+</sup> | Co <sup>2+</sup> | Co <sup>3+</sup> | Before Reduction                                             |                                                             | After Reduction                                              |                                                             |
|-----------------------------------|------------------|------------------|------------------|------------------|--------------------------------------------------------------|-------------------------------------------------------------|--------------------------------------------------------------|-------------------------------------------------------------|
|                                   |                  |                  |                  |                  | O <sub>latt</sub> /(O <sub>latt</sub> +O <sub>a</sub><br>ds) | O <sub>ads</sub> /(O <sub>latt</sub> +O <sub>a</sub><br>ds) | O <sub>latt</sub> /(O <sub>latt</sub> +O <sub>a</sub><br>ds) | O <sub>ads</sub> /(O <sub>latt</sub> +O <sub>a</sub><br>ds) |
| Co-Mn <sub>2</sub> O <sub>3</sub> |                  | 100%             | 30.34%           | 69.65%           | 59.52%                                                       | 40.47%                                                      | 51.52%                                                       | 48.47%                                                      |
| Co-Mn <sub>3</sub> O <sub>4</sub> | 37.58%           | 62.41%           | 39.82%           | 60.17%           | 59.34%                                                       | 40.66%                                                      | 57.54%                                                       | 42.45%                                                      |
| Co-MnO                            | 100%             |                  | 100%             |                  | 52.16%                                                       | 47.84%                                                      | 41.17%                                                       | 58.82%                                                      |

Table. S2 Comparison of CO oxidation performance of different manganese oxides

| Catalyst                       | Load content                   | Reaction gas                                    | Flow Rate  | Amount of catalyst used | Reaction temperature | Reference |
|--------------------------------|--------------------------------|-------------------------------------------------|------------|-------------------------|----------------------|-----------|
| MnO <sub>2</sub>               | CuO                            | 0.5% CO, 99.5% Air                              | 500 ml/min | 1g                      | T90=180°C            | [1]       |
| Cu-Mn mixed oxides             |                                | CO 0.5%-O <sub>2</sub> 0.25%                    | 100 ml/min | 50 mg                   | T90=420°C            | [2]       |
| MnO <sub>2</sub>               |                                | 1% CO 20% O <sub>2</sub> in Ar                  | 50 ml/min  | 50 mg                   | T50=135°C            | [3]       |
| MnO <sub>x</sub>               | ZrO <sub>2</sub>               | 2.5% CO + 2.5% O <sub>2</sub> + He              | 200 ml/min | 100 mg                  | T90=300°C            | [4]       |
| OMS-2                          | Co <sub>3</sub> O <sub>4</sub> | 1% CO, 10% O <sub>2</sub> ,                     | 100 ml/min | 250 mg                  | T50=165°C            | [5]       |
| Mn <sub>3</sub> O <sub>4</sub> | Cu                             | 1% CO, 1% O <sub>2</sub> and 98% N <sub>2</sub> | 100 ml/min | 100 mg                  | T90=225°C            | [6]       |
| γ-MnO <sub>2</sub>             |                                | 1% CO, 10% O <sub>2</sub>                       | 20 ml/min  | 160 mg                  | T90=220°C            | [7]       |
| MnO <sub>x</sub>               |                                | 1% CO 21%O <sub>2</sub>                         | 50ml/min   | 100 mg                  | T90=180°C            | [8]       |
| Mn <sub>2</sub> O <sub>3</sub> | Co <sub>3</sub> O <sub>4</sub> | 1% CO 21%O <sub>2</sub>                         | 50ml/min   | 50mg                    | T90=170°C            | This work |
| Mn <sub>3</sub> O <sub>4</sub> | Co <sub>3</sub> O <sub>4</sub> | 1% CO 21%O <sub>2</sub>                         | 50ml/min   | 50mg                    | T90=180°C            | This work |
| MnO                            | CoO                            | 1% CO 21%O <sub>2</sub>                         | 50ml/min   | 50mg                    | T90=220°C            | This work |

1. Y. Guo, C. Zhao, J. Lin, C. Li and S. Lu, *Catalysis Communications*, 2017, **99**, 1-5.
2. H. Einaga and A. Kiya, *Reaction Kinetics, Mechanisms and Catalysis*, 2016, **117**, 521-536.
3. F.-X. Tian, M. Zhu, X. Liu, W. Tu and Y.-F. Han, *Journal of Catalysis*, 2021, **401**, 115-128.
4. O. A. Bulavchenko, Z. S. Vinokurov, T. N. Afonassenko, E. Y. Gerasimov and V. P. Konovalova, *Materials Letters*, 2022, **315**.
5. J. He, S.-Y. Chen, W. Tang, Y. Dang, P. Kerns, R. Miao, B. Dutta, P.-X. Gao and S. L. Suib, *Applied Catalysis B: Environmental*, 2019, **255**.
6. C. Anil and G. Madras, *Journal of Molecular Catalysis A: Chemical*, 2016, **424**, 106-114.
7. S. Y. Chen, W. Song, H. J. Lin, S. Wang, S. Biswas, M. Mollahosseini, C. H. Kuo, P. X. Gao and S. L. Suib, *ACS Appl Mater Interfaces*, 2016, **8**, 7834-7842.
8. J. Li, L. Li, W. Cheng, F. Wu, X. Lu and Z. Li, *Chemical Engineering Journal*, 2014, **244**, 59-67.
